# Supplementary material for: Warmer spring temperatures in temperate deciduous forests advance the timing of tree growth but have little effect on annual woody productivity
Source: Research Square preprint supplement (doi:10.21203/rs.3.rs-1093360/v1), 2021-12-15
Supplement: Supplementary file 1 [file 665703cf8ad59a6d4a301f08.xlsx]

## Sheet: chronology_table_metadata
Column name	Definition	Units
Number	The chronology number as seen on Figure 3. Each number corresponds to a unique site/species combo.	-
Location	The geographical location that the cores were collected from to create the chronology.	-
Species	The species used to create the chronology	-
Wood Type	The porosity of the species used to generate the chronology. Either ring-porous (RP) or diffuse-porous (DP).	-
Latitude	The latitude of the location where the cores used to generate the chronology were collected.	°
Longitude	The longitude of the location where the cores used to generate the chronology were collected.	°
April Tmin	The average minimum temperature in April	°C
April Tmax	The average maximum temperature in April	°C
January	The correlation value between January maximum temperature and yearly ring-width across all study years. Represented by color in Figure 3.	-
January Sig	The p-value of the correlation value between January maximum temperature and yearly ring-width across all study years.	-
February	The correlation value between February maximum temperature and yearly ring-width across all study years. Represented by color in Figure 3.	-
February Sig	The p-value of the correlation value between February maximum temperature and yearly ring-width across all study years.	-
March	The correlation value between March maximum temperature and yearly ring-width across all study years. Represented by color in Figure 3.	-
March Sig	The p-value of the correlation value between March maximum temperature and yearly ring-width across all study years.	-
April	The correlation value between April maximum temperature and yearly ring-width across all study years. Represented by color in Figure 3.	-
April Sig	The p-value of the correlation value between April maximum temperature and yearly ring-width across all study years.	-
May	The correlation value between May maximum temperature and yearly ring-width across all study years. Represented by color in Figure 3.	-
May Sig	The p-value of the correlation value between May maximum temperature and yearly ring-width across all study years.	-
June	The correlation value between June maximum temperature and yearly ring-width across all study years. Represented by color in Figure 3.	-
June Sig	The p-value of the correlation value between June maximum temperature and yearly ring-width across all study years.	-
July	The correlation value between July maximum temperature and yearly ring-width across all study years. Represented by color in Figure 3.	-
July Sig	The p-value of the correlation value between July maximum temperature and yearly ring-width across all study years.	-
August	The correlation value between August maximum temperature and yearly ring-width across all study years. Represented by color in Figure 3.	-
August Sig	The p-value of the correlation value between August maximum temperature and yearly ring-width across all study years.	-
Slope April Tmax	The slope of the April factor in the linear model run to determine the interacting effect between spring and summer temperatures on yearly ring-widths	°C ^-1
P-value April Tmax	The p-value of the April factor in the linear model run to determine the interacting effect between spring and summer temperatures on yearly ring-widths	-
Slope June-July Tmax	The slope of the June-July factor in the linear model run to determine the interacting effect between spring and summer temperatures on yearly ring-widths	°C ^-1
P-value June-July Tmax	The p-value of the June-July factor in the linear model run to determine the interacting effect between spring and summer temperatures on yearly ring-widths	-

## Sheet: chronology_table
Number	Location	Species	Wood Type	Latitude	Longitude	April Tmin	April Tmax	January	January Sig	February	February Sig	March	March Sig	April	April Sig	May	May Sig	June	June Sig	July	July Sig	August	August Sig	Slope April Tmax	P-value April Tmax	Slope June-July Tmax	P-value June-July Tmax
1	Sheridan Mountain, VT	Quercus rubra	RP	44.5284	-71.6381	-2.73866	7.86471	0.150743	NS	0.102103	NS	-0.150814	NS	0.0298672	NS	-0.234084	<0.05	-0.0416722	NS	0.112758	NS	0.341474	<0.05	0.00165474	0.776998	0.00467298	0.705824
2	Goodnow Mountain, NY	Quercus rubra	RP	43.9077	-74.218	-3.69412	8.82689	-0.0377414	NS	0.154362	NS	-0.0247305	NS	0.0903432	NS	-0.0463591	NS	-0.17055	NS	-0.10641	NS	0.0810029	NS	0.00906875	0.225839	-0.0273166	0.0544708
3	UMB Flux Site, MI	Quercus rubra	RP	45.5598	-84.7138	-1.48824	10.0555	0.0330265	NS	0.154905	NS	0.0294481	NS	0.0465646	NS	0.0196485	NS	-0.0849752	NS	-0.0735926	NS	-0.110422	NS	0.00552008	0.455407	-0.0132776	0.282901
4	Rooster Hill, RH	Quercus rubra	RP	43.2314	-74.5225	-1.45798	10.8042	0.0662901	NS	-0.0136222	NS	-0.158757	NS	-0.0391332	NS	0.0171883	NS	-0.0900549	NS	-0.00728559	NS	0.0822395	NS	-0.00160492	0.758593	-0.0043328	0.656083
5	Lake George, NY	Quercus velutina	RP	43.6844	-73.6025	-1.12017	11.2782	0.0524596	NS	-0.161035	NS	-0.117418	NS	-0.094342	NS	0.0472547	NS	-0.298672	<0.002	-0.173743	NS	0.0223777	NS	-0.00382627	0.621552	-0.0438945	0.00397376
6	Winooski, VT	Carya ovata	RP	44.5558	-73.1131	0.342017	11.7328	-0.0994934	NS	0.0647844	NS	-0.0203541	NS	0.0147442	NS	0.0580734	NS	-0.331715	<0.002	-0.171661	NS	0.0210593	NS	0.00714318	0.367141	-0.0484673	0.00110562
7	Winooski, VT	Quercus alba	RP	44.5558	-73.1131	0.342017	11.7328	-0.0628154	NS	0.0868966	NS	0.0541065	NS	0.0453902	NS	-0.0808101	NS	-0.247141	<0.05	-0.258929	<0.05	0.0185977	NS	0.0122754	0.215677	-0.0600099	0.00122032
8	Winooski, VT	Quercus mongolica	RP	44.5558	-73.1131	0.342017	11.7328	0.0476484	NS	0.132147	NS	0.0243893	NS	0.0280959	NS	-0.0874306	NS	-0.159013	NS	-0.162218	NS	0.0863593	NS	0.00688679	0.445922	-0.0333112	0.0457314
9	Pine Lake, NY	Quercus rubra	RP	42.4713	-74.9258	-0.77563	11.9756	0.119388	NS	-0.118114	NS	-0.0813186	NS	-0.0463451	NS	-0.0183752	NS	-0.308904	<0.002	-0.238497	<0.05	-0.110563	NS	0.000867335	0.888981	-0.0418898	0.000556097
10	Zoar Lick, NY	Quercus rubra	RP	42.423	-78.8945	-0.576471	12.0168	-0.114583	NS	-0.105368	NS	0.00294316	NS	-0.127952	NS	0.132017	NS	-0.412864	<0.002	-0.137668	NS	-0.014511	NS	-0.00495343	0.43318	-0.0428599	0.00049695
11	Singer Farm, NY	Quercus rubra	RP	43.3496	-78.6612	2.11513	12.0361	-0.0197021	NS	-0.0583965	NS	-0.0178425	NS	-0.0981299	NS	0.241577	<0.05	-0.190016	<0.05	-0.0795225	NS	-0.00558549	NS	-0.00431054	0.464058	-0.0166204	0.11148
12	Warren Cutler Boy Scout Res., NY	Quercus rubra	RP	42.6825	-77.43	1.13613	12.205	-0.000285507	NS	-0.00682976	NS	-0.106435	NS	-0.174941	NS	0.0331686	NS	-0.229493	<0.05	-0.24174	<0.05	-0.194122	NS	-0.00624502	0.309659	-0.0327216	0.00427877
13	Arnot Forest, NY	Quercus rubra	RP	42.2716	-76.6268	0.464706	12.2639	0.102679	NS	-0.144982	NS	-0.1168	NS	-0.0803147	NS	-0.227426	<0.05	-0.326885	<0.002	-0.339373	<0.002	-0.140439	NS	0.000256895	0.966836	-0.0480518	2.99e-05
14	Goose Egg Ridge, NY	Quercus rubra	RP	43.0683	-73.29	-0.589916	12.4748	-0.0378263	NS	-0.17234	<0.05	-0.17077	<0.05	-0.2405	<0.05	0.0397381	NS	-0.257441	<0.05	-0.10311	NS	0.00658772	NS	-0.0132781	0.0223754	-0.0242497	0.0305328
15	Goose Egg Ridge, NY	Quercus alba	RP	43.0683	-73.29	-0.589916	12.4748	-0.0131992	NS	-0.0709438	NS	-0.0688459	NS	-0.105785	NS	-0.0993485	NS	-0.253173	<0.05	-0.34551	<0.002	-0.0216893	NS	-0.00524406	0.440717	-0.049453	0.000251184
16	Goose Egg Ridge, NY	Quercus mongolica	RP	43.0683	-73.29	-0.589916	12.4748	0.0660691	NS	-0.030987	NS	-0.142643	NS	-0.156288	NS	-0.0535577	NS	-0.21641	<0.05	-0.213659	<0.05	0.0263222	NS	-0.00907346	0.197825	-0.034454	0.0119216
17	Stott Farm, Argyle, NY	Carya glabra	RP	43.188	-73.4988	-0.589916	12.4748	-0.139692	NS	0.0157716	NS	-0.0273046	NS	0.0103785	NS	0.0542096	NS	-0.438967	<0.002	-0.285879	<0.05	-0.126681	NS	0.00366597	0.545544	-0.0569848	3.46e-06
18	Breglia Cliffs, NY	Quercus mongolica	RP	42.6086	-74.3182	-0.00504202	12.6252	0.125269	NS	0.102729	NS	0.0501445	NS	-0.00870946	NS	-0.123303	NS	-0.261204	<0.05	-0.319023	<0.002	-0.0811116	NS	0.0022152	0.69284	-0.0393149	0.000420795
19	Curtiss-Gale Wildlife Preserve, NY	Quercus rubra	RP	43.2886	-76.3885	2.21008	12.6538	0.0616899	NS	-0.082362	NS	-0.112186	NS	-0.119012	NS	-0.00368472	NS	-0.220827	<0.05	-0.183259	NS	-0.145532	NS	-0.00377681	0.51998	-0.0249229	0.0172304
20	Whiskey Hollow, NY	Quercus mongolica	RP	43.1191	-76.3868	2.21008	12.6538	-0.01633	NS	0.112279	NS	-0.0839606	NS	-0.00941338	NS	-0.1096	NS	-0.275046	<0.05	-0.222889	<0.05	-0.0669454	NS	0.00427388	0.5681	-0.0422906	0.0017084
21	Mt.Agamenticus, ME	Quercus mongolica	RP	43.2281	-70.6892	0.568908	12.9504	0.133791	NS	-0.0322914	NS	0.00719695	NS	-0.0385089	NS	-0.0499917	NS	-0.227095	<0.05	-0.136131	NS	0.0592188	NS	-0.000522761	0.952279	-0.029298	0.0197187
22	Prospect Mountain, NY	Carya ovata	RP	43.4217	-73.57	0.289916	13.0176	0.0716281	NS	0.0406066	NS	-0.106436	NS	-0.150552	NS	0.139461	NS	-0.261289	<0.05	-0.235626	<0.05	-0.0258639	NS	-0.00828968	0.227283	-0.0375268	0.00473894
23	Prospect Mountain, NY	Quercus rubra	RP	43.4183	-73.7551	0.289916	13.0176	0.032857	NS	-0.125356	NS	-0.149637	NS	-0.11338	NS	-0.0333931	NS	-0.372105	<0.002	-0.137732	NS	0.0251392	NS	-0.00472317	0.377468	-0.0339561	0.00115043
24	Wachusett Mountain, MA	Quercus rubra	RP	42.49	-71.88	1.82689	13.0807	-0.00268351	NS	-0.197547	NS	-0.20589	<0.05	-0.224718	<0.05	-0.152133	NS	-0.195225	<0.05	0.0353254	NS	-0.0727056	NS	-0.00981008	0.124599	-0.00813318	0.416255
25	Mashomack Preserve, NY	Quercus stellata	RP	41.0415	-72.2845	3.16471	13.2084	0.0128051	NS	0.0958327	NS	-0.00510667	NS	0.0581433	NS	-0.0809167	NS	-0.0166589	NS	-0.10599	NS	-0.00532077	NS	0.00776029	0.323106	-0.0127191	0.303281
26	Aquidneck, RH	Quercus rubra	RP	41.5693	-71.284	2.8958	13.4504	-0.0123974	NS	-0.0766209	NS	-0.130602	NS	-0.129966	NS	0.0388195	NS	-0.285213	<0.002	-0.256505	<0.05	-0.235645	<0.05	-0.00118208	0.857922	-0.0316911	0.00140702
27	New Port, RI	Quercus alba	RP	41.557	-71.2668	2.8958	13.4504	0.0852745	NS	-0.0055379	NS	-0.14405	NS	-0.15992	NS	0.0421643	NS	-0.0862182	NS	-0.100535	NS	-0.131842	NS	-0.00616843	0.405545	-0.00967058	0.369824
28	Mohawk Trail St.Forest, MA	Quercus rubra	RP	42.0609	-72.3009	1.46471	13.9126	0.0472284	NS	-0.166007	NS	0.0733521	NS	-0.0961311	NS	-0.0127165	NS	-0.0547036	NS	-0.0554797	NS	-0.09363	NS	-0.0208244	0.570316	-0.0404536	0.498878
29	Lisha Kill, NY	Carya glabra	RP	42.795	-73.8601	1.7437	14.2714	0.0394996	NS	-0.0402681	NS	-0.00590935	NS	-0.103114	NS	-0.113073	NS	-0.28391	<0.05	-0.372063	<0.002	-0.0247066	NS	-0.00297551	0.617643	-0.0485373	4.83e-05
30	Lisha Kill, NY	Quercus alba	RP	42.7915	-73.8585	1.7437	14.2714	0.24012	<0.05	0.0358138	NS	-0.0781241	NS	-0.287188	<0.002	-0.296921	<0.05	-0.117407	NS	-0.354717	<0.002	-0.0514518	NS	-0.0153912	0.00771367	-0.0272567	0.0138287
31	Harvard Forest, MA	Fraxinus americana	RP	42.53	-72.18	0.596639	14.3882	0.190581	NS	0.132612	NS	0.0409496	NS	0.0446638	NS	-0.268068	<0.05	0.0928013	NS	0.157169	NS	0.0704436	NS	0.00148461	0.830652	0.0183606	0.124042
32	Harvard Forest, MA	Quercus rubra	RP	42.5388	-72.1755	0.596639	14.3882	0.0232832	NS	-0.134523	NS	-0.071334	NS	-0.122299	NS	0.0211799	NS	-0.180198	<0.05	-0.0296095	NS	-0.0439309	NS	-0.00926159	0.125376	0.000620076	0.951576
33	NorthRoundPondPlot2, NH	Fraxinus americana	RP	42.8477	-72.4475	0.596639	14.3882	0.115978	NS	0.0210238	NS	-0.0540331	NS	-0.00314514	NS	-0.0892444	NS	-0.147252	NS	0.13131	NS	0.236909	<0.05	0.00017287	0.97724	-0.0043901	0.690415
34	NorthRoundPondPlot3, NH	Quercus rubra	RP	42.8442	-72.4498	0.596639	14.3882	-0.0992532	NS	-0.175602	NS	-0.129582	NS	-0.0533794	NS	-0.0646705	NS	-0.169792	<0.05	-0.181245	<0.05	-0.0270936	NS	-0.000311035	0.952977	-0.0213202	0.0187766
35	Harvard Forest LyfordPlots, MA	Quercus rubra	RP	42.5388	-72.1755	0.596639	14.3882	0.0593468	NS	-0.124069	NS	-0.1411	NS	-0.142531	NS	0.0942464	NS	-0.119871	NS	0.102624	NS	0.00857189	NS	-0.00926159	0.125376	0.000620076	0.951576
36	Alan Seeger Natural Area, PA	Quercus alba	RP	40.69	-77.75	2.96218	14.6874	0.102665	NS	-0.148871	NS	-0.00127748	NS	0.0317961	NS	-0.0954914	NS	-0.234693	<0.05	-0.246528	<0.05	-0.240311	<0.05	0.004335	0.505282	-0.0336509	0.0020587
37	Alan Seeger Natural Area, PA	Quercus rubra	RP	40.69	-77.75	2.96218	14.6874	0.121334	NS	-0.205132	<0.05	-0.0752762	NS	-0.0650552	NS	-0.150558	NS	-0.283899	<0.002	-0.288081	<0.05	-0.24103	<0.002	-0.00312748	0.658575	-0.0419427	0.000453726
38	Douglas, IN	Quercus alba	RP	41.5183	-84.8661	2.37311	14.6941	0.0948744	NS	0.00040009	NS	-0.110523	NS	-0.00797437	NS	-0.0852858	NS	-0.351786	<0.002	-0.291005	<0.05	-0.342083	<0.002	0.0032147	0.574353	-0.037976	2.16e-05
39	Bronx, Hunter Island, NY	Quercus stellata	RP	40.8755	-73.79	5.64538	14.7908	0.120482	NS	0.0147209	NS	-0.0206254	NS	-0.134868	NS	-0.183863	<0.05	-0.267115	<0.05	-0.212219	<0.05	0.00386039	NS	-0.00534575	0.481231	-0.0309399	0.010409
40	Montgomery Place, NY	Quercus mongolica	RP	42.0088	-73.9188	1.97815	14.805	0.0495564	NS	0.106228	NS	0.0768172	NS	-0.0297979	NS	0.12385	NS	0.00997628	NS	0.0100452	NS	0.0662958	NS	-0.00285628	0.80694	0.00121977	0.954965
41	Montgomery Place, NY	Quercus rubra	RP	42.0088	-73.9188	1.97815	14.805	0.105599	NS	-0.0429325	NS	-0.0754455	NS	-0.0147311	NS	-0.110115	NS	-0.249431	<0.05	-0.115126	NS	-0.0324425	NS	0.00209104	0.743984	-0.0294321	0.0147604
42	Rams Horn Swamp, NY	Quercus alba	RP	42.1994	-73.8648	1.97815	14.805	0.010183	NS	0.0790566	NS	-0.155077	NS	0.0378621	NS	-0.125333	NS	0.0818885	NS	-0.270628	<0.05	-0.245519	<0.05	0.00536285	0.491189	-0.0211413	0.145131
43	Goll, OH	Carya ovata	RP	41.554	-84.362	2.35882	15.058	-0.0617301	NS	-0.133206	NS	-0.156592	NS	0.112079	NS	0.0654063	NS	-0.381061	<0.002	-0.264909	<0.002	-0.251306	<0.05	0.0105414	0.0491678	-0.0390559	4.42e-06
44	Goll, OH	Quercus alba	RP	41.554	-84.362	2.35882	15.058	0.0942088	NS	-0.0520766	NS	-0.0702159	NS	-0.049709	NS	-0.167302	NS	-0.473184	<0.002	-0.426243	<0.002	-0.30667	<0.05	0.00182381	0.740566	-0.05739	3.88e-10
45	Johnson State Nature Preserve, OH	Carya ovata	RP	40.88	-81.75	3.27395	15.137	0.0609873	NS	-0.0632464	NS	-0.05188	NS	0.0301441	NS	-0.0953524	NS	-0.354055	<0.002	-0.360059	<0.002	-0.139348	NS	0.00232135	0.573276	-0.0346868	2.66e-06
46	Johnson State Nature Preserve, OH	Quercus alba	RP	40.88	-81.75	3.27395	15.137	-0.051082	NS	-0.120119	NS	-0.0292108	NS	-0.222198	<0.05	-0.12291	NS	-0.381284	<0.002	-0.258493	<0.05	-0.221036	<0.05	-0.0141097	0.0179858	-0.0418368	6.36e-05
47	Johnson State Nature Preserve, OH	Quercus rubra	RP	40.88	-81.75	3.27395	15.137	-0.144293	NS	0.0256722	NS	-0.0244777	NS	-0.0389054	NS	0.110123	NS	-0.153612	NS	0.0279192	NS	0.113778	NS	-0.0020309	0.699678	-0.00781618	0.384994
48	Black Rock Blueberry Fields, Black Rock Forest, NY	Quercus rubra	RP	41.383	-74.017	2.65714	15.2168	0.156856	NS	0.0469296	NS	0.0239058	NS	-0.0840519	NS	0.00235194	NS	0.00591959	NS	0.0885175	NS	-0.0156516	NS	-0.0261174	0.415129	0.0298285	0.566909
49	Black Rock Lucky Streak Red, Black Rock Forest, NY	Quercus rubra	RP	41.383	-74.017	2.65714	15.2168	0.110364	NS	-0.112061	NS	-0.0748941	NS	-0.0854589	NS	0.0312184	NS	-0.282761	<0.002	-0.294041	<0.002	0.0176197	NS	-0.0261174	0.415129	0.0298285	0.566909
50	Schunemunk, NY	Quercus alba	RP	41.3761	-74.1155	2.65714	15.2168	0.180648	NS	-0.058533	NS	-0.0361998	NS	-0.248697	<0.05	-0.135532	NS	-0.0893186	NS	-0.300825	<0.002	-0.0253629	NS	-0.012999	0.0589109	-0.023762	0.0346187
51	Uttertown, NJ	Quercus rubra	RP	41.1171	-74.417	2.65714	15.2168	0.129377	NS	-0.118142	NS	-0.0241029	NS	-0.00701049	NS	-0.0363493	NS	-0.201659	<0.05	-0.312494	<0.05	-0.111411	NS	0.0055349	0.477852	-0.0425879	0.0011129
52	Mohonk Preserve, Lenape Lane, NY	Quercus mongolica	RP	41.7638	-74.1247	2.05294	15.3	0.250086	<0.05	0.0132836	NS	-0.058704	NS	-0.128616	NS	-0.154619	NS	-0.189408	<0.05	-0.293753	<0.002	-0.0602288	NS	-0.00658953	0.367351	-0.0332426	0.007873
53	Mohonk Preserve, Lenape Lane, NY	Quercus velutina	RP	41.7638	-74.1247	2.05294	15.3	0.0542543	NS	-0.100601	NS	-0.145068	NS	-0.0826891	NS	-0.0992414	NS	-0.276396	<0.002	-0.333065	<0.002	-0.0476117	NS	-0.00104543	0.866348	-0.0431392	7.47e-05
54	Mohonk Preserve, Bonticou Crag, NY	Carya glabra	RP	41.8012	-74.1057	2.05294	15.3	0.12743	NS	0.123805	NS	0.0874183	NS	-0.0115054	NS	-0.184935	NS	-0.259431	<0.05	-0.228212	<0.05	-0.106393	NS	0.00367149	0.626531	-0.0406158	0.00181048
55	Palmaghatt5, NY	Quercus mongolica	RP	41.7055	-74.2517	2.05294	15.3	0.12294	NS	-0.00738033	NS	-0.147205	NS	-0.0571586	NS	-0.148399	NS	-0.241513	<0.05	-0.336609	<0.002	-0.061922	NS	0.0011549	0.891698	-0.0535557	0.000267391
56	Palmaghatt5, NY	Quercus rubra	RP	41.7055	-74.2517	2.05294	15.3	0.0476013	NS	-0.130479	NS	-0.173856	<0.05	-0.0343302	NS	-0.0935329	NS	-0.360275	<0.002	-0.312745	<0.002	-0.12797	NS	0.00378333	0.577975	-0.0532498	8.45e-06
57	Oppenheim, IN	Carya ovata	RP	41.3395	-85.7635	3.52689	15.4151	0.0505163	NS	-0.130289	NS	-0.026286	NS	0.0489531	NS	-0.0236837	NS	-0.328178	<0.002	-0.18228	NS	-0.137915	NS	0.00648753	0.289682	-0.0336749	0.000439799
58	Oppenheim, IN	Quercus rubra	RP	41.3395	-85.7635	3.52689	15.4151	-0.1782	NS	0.0629367	NS	0.0711302	NS	-0.0344596	NS	0.0241781	NS	0.00492598	NS	-0.0437343	NS	-0.0202055	NS	-0.00127815	0.840325	-0.00525745	0.586963
59	DaveyWoods, OH	Quercus rubra	RP	40.1376	-83.9079	2.83193	15.5571	0.172445	NS	0.011234	NS	-0.0752142	NS	0.0510425	NS	-0.153226	NS	-0.3326	<0.002	-0.296517	<0.002	-0.176106	NS	0.00768503	0.282146	-0.0507607	8.46e-06
60	Starved Rock, IL	Quercus alba	RP	41.3072	-88.9938	4.01513	16.1546	-0.046263	NS	-0.101521	NS	-0.127822	NS	-0.135892	NS	-0.165121	NS	-0.504354	<0.002	-0.322306	<0.002	-0.166134	<0.05	-0.00399347	0.45309	-0.0451847	1.05e-07
61	Starved Rock, IL	Quercus rubra	RP	41.3072	-88.9938	4.01513	16.1546	-0.121723	NS	-0.137262	NS	-0.151058	NS	-0.100744	NS	-0.0817399	NS	-0.53089	<0.002	-0.280536	<0.05	-0.12603	NS	-0.00228304	0.694481	-0.0481488	2e-07
62	Palisades-Kepler State Park, IA	Carya ovata	RP	41.9082	-91.5128	3.79748	16.5227	0.0539372	NS	0.028337	NS	-0.211267	<0.05	-0.080518	NS	-0.0624604	NS	-0.357679	<0.002	-0.320705	<0.05	-0.0871854	NS	-0.00165176	0.798354	-0.0414867	3e-05
63	Palisades-Kepler State Park, IA	Quercus alba	RP	41.9082	-91.5128	3.79748	16.5227	-0.0149629	NS	0.0328186	NS	-0.206185	<0.05	-0.194492	<0.05	-0.211177	NS	-0.476883	<0.002	-0.276294	<0.002	-0.0849572	NS	-0.0084643	0.116347	-0.0432088	2.83e-07
64	Meltzer, IN	Carya ovata	RP	39.5051	-85.6691	4.6479	16.8092	-0.000728041	NS	-0.0840314	NS	-0.158142	NS	-0.0103559	NS	-0.173124	NS	-0.409033	<0.002	-0.314536	<0.002	-0.379443	<0.002	0.000712963	0.913524	-0.0471352	2.16e-06
65	Meltzer, IN	Fraxinus nigra	RP	39.5051	-85.6691	4.6479	16.8092	0.0454332	NS	-0.0282286	NS	-0.0845839	NS	-0.0443633	NS	-0.143689	NS	-0.444829	<0.002	-0.196689	<0.05	-0.220785	<0.05	-0.00114212	0.857258	-0.0394016	3.4e-05
66	Meltzer, IN	Quercus macrocarpa	RP	39.5051	-85.6691	4.6479	16.8092	-0.0757121	NS	-0.0242733	NS	-0.0269468	NS	0.00758216	NS	-0.125998	NS	-0.47312	<0.002	-0.250597	<0.05	-0.31029	<0.05	0.00263647	0.62771	-0.0397555	1.44e-06
67	Cedar Knob, WV	Quercus mongolica	RP	38.65	-79.3667	2.67815	17.1882	0.111297	NS	0.0233062	NS	0.0197524	NS	-0.23265	<0.05	-0.0109753	NS	-0.234197	<0.05	-0.207685	<0.05	-0.321764	<0.002	-0.0111013	0.0358088	-0.0242449	0.0131936
68	Geode State Park, IA	Quercus alba	RP	40.8247	-91.3918	4.53193	17.2655	-0.0111256	NS	-0.021232	NS	-0.159704	NS	-0.0993743	NS	-0.288474	<0.05	-0.607888	<0.002	-0.438874	<0.002	-0.241641	<0.05	-0.00198877	0.695285	-0.0643523	1.66e-14
69	Lacey Keosauqua State Park, IA	Carya ovata	RP	40.7166	-91.9819	4.83866	17.3328	-0.0896594	NS	0.061514	NS	-0.177253	NS	0.0864347	NS	-0.128241	NS	-0.366186	<0.002	-0.225796	<0.05	-0.169223	NS	0.00939526	0.148189	-0.0385398	5.2e-05
70	Lacey Keosauqua State Park, IA	Quercus alba	RP	40.7166	-91.9819	4.83866	17.3328	-0.0190264	NS	-0.11195	NS	-0.265893	<0.002	-0.0924809	NS	-0.258606	<0.05	-0.53414	<0.002	-0.354732	<0.002	-0.210384	<0.05	-0.00149172	0.774755	-0.0518564	1.61e-10
71	Green Ridge, MD	Carya ovata	RP	39.6569	-78.4005	4.27311	17.4647	0.18632	NS	-0.00783637	NS	-0.0426057	NS	-0.0528626	NS	-0.210659	<0.05	-0.239277	<0.05	-0.173152	<0.05	-0.310212	<0.05	-0.00366401	0.62975	-0.0325998	0.0124681
72	Kickapoo, IL	Carya ovata	RP	40.1383	-87.7458	4.78067	17.5084	-0.0125402	NS	-0.0993574	NS	-0.0281391	NS	-0.0538682	NS	-0.132967	NS	-0.540599	<0.002	-0.32087	<0.002	-0.225542	<0.05	0.000138186	0.983375	-0.057749	9.92e-09
73	Kickapoo, IL	Quercus alba	RP	40.1383	-87.7458	4.78067	17.5084	0.00677181	NS	-0.0829899	NS	-0.0852548	NS	-0.128331	NS	-0.222509	<0.05	-0.619971	<0.002	-0.364273	<0.002	-0.261285	<0.05	-0.00462896	0.470044	-0.067093	2.19e-11
74	Otter Creek, PA	Quercus alba	RP	39.8785	-76.3864	4.1395	17.6261	0.109795	NS	0.0163013	NS	-0.0586733	NS	-0.0460665	NS	-0.310615	<0.002	-0.271365	<0.002	-0.305767	<0.002	-0.152984	NS	0.00209082	0.787293	-0.0510757	0.000288608
75	Otter Creek, PA	Quercus rubra	RP	39.8785	-76.3864	4.1395	17.6261	0.070459	NS	-6.08e-05	NS	-0.0930622	NS	0.0187152	NS	-0.165008	NS	-0.254428	<0.002	-0.255387	<0.05	-0.12597	NS	0.00797984	0.256652	-0.0451954	0.000408799
76	Otter Creek, PA	Quercus velutina	RP	39.8785	-76.3864	4.1395	17.6261	0.0586955	NS	0.0810617	NS	-0.0491333	NS	0.0200804	NS	-0.196771	<0.05	-0.300693	<0.002	-0.228795	<0.002	-0.0674814	NS	0.00756374	0.32506	-0.0497224	0.000357256
77	Browning Hill, IN	Quercus rubra	RP	39.0602	-86.2793	5.06218	18.0067	0.0346139	NS	-0.0568565	NS	-0.156239	NS	0.0176913	NS	-0.0161899	NS	-0.397971	<0.002	-0.273016	<0.05	-0.0862535	NS	0.00290944	0.669318	-0.044517	1.39e-05
78	Lily Dicky Nature Preserve, IN	Carya ovata	RP	39.2361	-86.2204	5.06218	18.0067	0.19504	<0.05	0.235729	<0.05	-0.15968	<0.05	0.0360964	NS	0.0887962	NS	0.1244	NS	0.0228307	NS	0.117544	NS	0.00232635	0.75064	0.00905567	0.385498
79	Lily Dicky Nature Preserve, IN	Quercus alba	RP	39.2361	-86.2204	5.06218	18.0067	0.00716541	NS	0.0497182	NS	-0.0926482	NS	-0.051494	NS	-0.184341	<0.05	-0.521166	<0.002	-0.372041	<0.002	-0.376719	<0.002	-0.00158828	0.829953	-0.068757	1.93e-09
80	Lily Dicky Nature Preserve, IN	Quercus mongolica	RP	39.2361	-86.2204	5.06218	18.0067	0.125398	NS	0.114145	NS	-0.157912	NS	-0.0393397	NS	-0.18896	<0.05	-0.47404	<0.002	-0.249632	<0.05	-0.285483	<0.05	-0.00165341	0.804792	-0.0449247	6.73e-06
81	Lily Dicky Nature Preserve, IN	Quercus velutina	RP	39.2361	-86.2204	5.06218	18.0067	0.042679	NS	0.0552801	NS	-0.100193	NS	-0.014117	NS	-0.184738	<0.05	-0.488611	<0.002	-0.294207	<0.05	-0.276381	<0.05	0.000917434	0.882302	-0.0477841	3.4e-07
82	MMSF Flux Site, IN	Carya ovata	RP	39.3232	-86.4131	5.06218	18.0067	0.0374593	NS	0.0397778	NS	0.0238152	NS	0.0578094	NS	-0.150975	NS	-0.452178	<0.002	-0.25179	<0.05	-0.397551	<0.002	0.00647526	0.347729	-0.0482596	2.53e-06
83	MMSF Flux Site, IN	Quercus alba	RP	39.3232	-86.4131	5.06218	18.0067	-0.0800231	NS	-0.0490739	NS	-0.136806	NS	0.136714	NS	-0.103525	NS	-0.385643	<0.002	-0.219593	<0.05	-0.247411	<0.05	0.00902307	0.264882	-0.0455277	9.9e-05
84	Lincoln's New Salem, IL	Carya ovata	RP	39.9829	-89.8524	5.92185	18.0697	-0.0896594	NS	-0.0881725	NS	-0.057023	NS	0.0158657	NS	-0.19665	<0.05	-0.56489	<0.002	-0.292193	<0.002	-0.32364	<0.002	0.00336988	0.525198	-0.045619	1.29e-08
85	Lincoln's New Salem, IL	Quercus alba	RP	39.9829	-89.8524	5.92185	18.0697	-0.0211555	NS	-0.0141041	NS	-0.165467	NS	-0.122024	NS	-0.32502	<0.05	-0.64804	<0.002	-0.364498	<0.002	-0.314769	<0.002	-0.00433353	0.468644	-0.065716	2.51e-12
86	Riddle, OH	Quercus alba	RP	39.3494	-82.0724	4.15294	18.1261	0.05899	NS	-0.159823	NS	-0.120396	NS	-0.166943	NS	-0.147887	NS	-0.313102	<0.002	-0.140626	NS	-0.221264	<0.05	-0.0119516	0.0522327	-0.0281067	0.00803301
87	Riddle, OH	Quercus mongolica	RP	39.3494	-82.0724	4.15294	18.1261	0.106686	NS	-0.102741	NS	-0.0924414	NS	-0.206682	<0.05	-0.26981	<0.002	-0.415096	<0.002	-0.229628	<0.05	-0.22516	<0.05	-0.0146674	0.0190775	-0.0440328	5.87e-05
88	MurphyTract, WV	Quercus alba	RP	39.2621	-80.9974	3.42857	18.1555	0.133525	NS	-0.116372	NS	-0.0221864	NS	-0.145511	NS	-0.34288	<0.002	-0.333579	<0.002	-0.25345	<0.05	-0.246017	<0.05	-0.0098998	0.154207	-0.0434972	0.00134772
89	Hoot Woods Site Easement, IN	Carya ovata	RP	39.25	-86.89	5.34034	18.3118	0.0309656	NS	-0.0677921	NS	-0.0257726	NS	-0.0357234	NS	-0.106512	NS	-0.462903	<0.002	-0.264514	<0.05	-0.276787	<0.05	-5.68e-05	0.994184	-0.0564291	1.61e-06
90	Hoot Woods Site Easement, IN	Fraxinus americana	RP	39.25	-86.89	5.34034	18.3118	0.0418227	NS	-0.0421685	NS	-0.211221	<0.05	-0.124453	NS	-0.204192	<0.05	-0.451585	<0.002	-0.296922	<0.002	-0.159347	NS	-0.00872121	0.250538	-0.0535266	2.62e-06
91	Hoot Woods Site Easement, IN	Quercus rubra	RP	39.25	-86.89	5.34034	18.3118	-0.0170307	NS	-0.0567018	NS	-0.0771882	NS	0.115469	NS	-0.0729042	NS	-0.39785	<0.002	-0.298445	<0.002	-0.153182	NS	0.00871213	0.140813	-0.0383519	1.31e-05
92	Bent Creek, NC	Quercus stellata	RP	35.5	-82.6	4.32857	18.5025	0.104293	NS	-0.0413374	NS	0.100997	NS	-0.0282747	NS	-0.182937	NS	-0.285205	<0.05	-0.145434	NS	0.0256803	NS	-0.00304536	0.639632	-0.026982	0.00978711
93	Potomac River, Dranesville, VA	Quercus mongolica	RP	39.0581	-77.3299	5.26639	18.5345	0.165296	NS	-0.0982522	NS	-0.0979119	NS	-0.0224522	NS	-0.349553	<0.002	-0.186016	NS	-0.304003	<0.002	-0.151508	NS	-0.00106529	0.855115	-0.0304333	0.00460201
94	Fox Ridge, IL	Carya ovata	RP	39.3956	-88.1613	6.3563	18.6412	-0.00137579	NS	-0.0429791	NS	-0.14425	NS	0.0491182	NS	-0.0880897	NS	-0.400297	<0.002	-0.163093	<0.05	-0.0306457	NS	0.00546564	0.400911	-0.034008	0.000280526
95	Fox Ridge, IL	Quercus alba	RP	39.3956	-88.1613	6.3563	18.6412	-0.0770848	NS	-0.113179	NS	-0.0863744	NS	-0.128651	NS	-0.280098	<0.05	-0.56695	<0.002	-0.410701	<0.002	-0.287393	<0.002	-0.00640611	0.296317	-0.0616645	6.56e-11
96	Lil Scaly Mountain, NC	Quercus alba	RP	35.0313	-83.2577	4.49496	18.7168	-0.0412369	NS	-0.110321	NS	0.0351144	NS	-0.0249073	NS	0.0175555	NS	-0.213428	<0.05	-0.0236944	NS	-0.0763709	NS	-0.00361417	0.602111	-0.0162194	0.126423
97	MOz Flux Site, MO	Quercus alba	RP	38.7441	-92.2	6.88908	19.0975	0.0342334	NS	-0.0154813	NS	-0.174486	NS	0.0106595	NS	-0.339159	<0.002	-0.598446	<0.002	-0.488535	<0.002	-0.391981	<0.002	0.00908126	0.196039	-0.0803431	7.32e-14
98	Donaldson Woods Nature Preserve, IN	Carya ovata	RP	38.73	-86.42	5.52101	19.1109	0.0215493	NS	-0.0734608	NS	-0.00543927	NS	0.0932429	NS	-0.232535	<0.05	-0.498654	<0.002	-0.245383	<0.05	-0.342011	<0.002	0.00957075	0.216208	-0.0551815	1.75e-06
99	Donaldson Woods Nature Preserve, IN	Quercus alba	RP	38.73	-86.42	5.52101	19.1109	0.0558228	NS	0.036332	NS	-0.0386394	NS	-0.0562891	NS	-0.243655	<0.05	-0.537106	<0.002	-0.330211	<0.002	-0.36547	<0.002	-0.00308841	0.633003	-0.0551561	2.29e-08
100	Donaldson Woods Nature Preserve, IN	Quercus rubra	RP	38.73	-86.42	5.52101	19.1109	-0.052576	NS	-0.0828685	NS	-0.0571172	NS	0.0348494	NS	-0.170307	NS	-0.447349	<0.002	-0.325898	<0.002	-0.261184	<0.05	0.00339844	0.541078	-0.0431608	2.66e-07
101	Donaldson Woods Nature Preserve, IN	Quercus velutina	RP	38.73	-86.42	5.52101	19.1109	-0.0768605	NS	0.0026025	NS	-0.090267	NS	-0.120672	NS	-0.193675	NS	-0.541683	<0.002	-0.302059	<0.002	-0.326091	<0.002	-0.00676478	0.231112	-0.0468955	4.46e-08
102	Pionner Mothers Research Natural Area, IN	Carya ovata	RP	38.54	-86.45	5.52101	19.1109	0.0581371	NS	0.0219102	NS	-0.0620705	NS	-0.0166268	NS	-0.261413	<0.05	-0.465179	<0.002	-0.251594	<0.05	-0.277903	<0.05	0.00181554	0.82445	-0.0588161	1.83e-06
103	Pionner Mothers Research Natural Area, IN	Quercus alba	RP	38.54	-86.45	5.52101	19.1109	0.103029	NS	0.0136824	NS	-0.0236336	NS	-0.119492	NS	-0.176413	NS	-0.598442	<0.002	-0.296394	<0.05	-0.30285	<0.002	-0.00640833	0.301672	-0.0596109	1.02e-09
104	Pionner Mothers Research Natural Area, IN	Quercus rubra	RP	38.54	-86.45	5.52101	19.1109	-0.0306436	NS	-0.0488528	NS	-0.0406493	NS	0.121431	NS	-0.173169	NS	-0.571488	<0.002	-0.376697	<0.002	-0.329009	<0.002	0.0116371	0.0407244	-0.0583163	5.86e-11
105	Babler, MO	Carya ovata	RP	38.6204	-90.6947	7.33613	19.2193	-0.139718	NS	0.0608866	NS	-0.0286236	NS	0.0174598	NS	-0.109755	NS	-0.464753	<0.002	-0.284923	<0.002	-0.214219	<0.05	0.0042906	0.554278	-0.0487857	2.73e-06
106	Babler, MO	Quercus alba	RP	38.6204	-90.6947	7.33613	19.2193	-0.016612	NS	0.0319321	NS	-0.135297	NS	-0.0206993	NS	-0.310306	<0.002	-0.61933	<0.002	-0.465683	<0.002	-0.412932	<0.002	0.00416616	0.440992	-0.0683701	1.34e-15
107	Beall Woods, IL	Fraxinus americana	RP	38.3498	-87.8281	7.31765	19.2235	0.0883814	NS	-0.0603881	NS	-0.10997	NS	-0.152616	NS	-0.291779	<0.05	-0.473411	<0.002	-0.254865	<0.05	-0.185129	NS	-0.00918833	0.147303	-0.0473236	9.9e-07
108	Beall Woods, IL	Quercus alba	RP	38.3498	-87.8281	7.31765	19.2235	-0.0679153	NS	-0.0032647	NS	0.147675	NS	-0.0222062	NS	-0.264608	<0.05	-0.51739	<0.002	-0.227982	<0.05	-0.230207	<0.05	0.00135304	0.83708	-0.0507658	3.74e-07
109	Saunders, IN	Carya ovata	RP	38.3707	-87.7173	7.31765	19.2235	-0.154777	NS	-0.146725	NS	0.0377123	NS	-0.0655432	NS	-0.0203329	NS	-0.421227	<0.002	-0.24079	<0.05	-0.179338	NS	-0.00328599	0.668728	-0.0506332	1.06e-05
110	Saunders, IN	Quercus pagoda	RP	38.3707	-87.7173	7.31765	19.2235	-0.0382768	NS	-0.0115123	NS	0.0864797	NS	0.132562	NS	-0.239878	<0.05	-0.298266	<0.002	-0.237546	<0.05	-0.240613	<0.002	0.0109455	0.124429	-0.0338077	0.000770286
111	Joyce Kilmer, NC	Quercus rubra	RP	35.3585	-83.9303	5.26891	19.3992	0.0287982	NS	-0.178668	NS	-0.011369	NS	0.100921	NS	0.047277	NS	0.0558529	NS	0.0630974	NS	-0.0272102	NS	0.0109372	0.154923	0.00556082	0.619957
112	Joyce Kilmer, NC	Quercus rubra	RP	35.598	-83.4224	5.3042	19.616	0.129091	NS	-0.196101	NS	-0.136995	NS	0.148703	NS	0.15381	NS	-0.0330742	NS	0.0266072	NS	0.0258689	NS	0.0105856	0.100048	-0.00264606	0.787057
113	Greenbriar, TN	Quercus mongolica	RP	35.7067	-83.3388	5.3042	19.616	-0.0116149	NS	-0.126391	NS	-0.130013	NS	0.1982	NS	-0.130827	NS	-0.109148	NS	-0.0164725	NS	-0.151103	NS	0.0134022	0.0469124	-0.00994328	0.33228
114	Blanton Forest, KY	Quercus alba	RP	36.8752	-83.3604	5.6563	19.7672	-0.00808647	NS	-0.0522982	NS	-0.0626098	NS	-0.0714526	NS	0.139831	NS	-0.325246	<0.05	-0.168819	NS	-0.116164	NS	-0.003477	0.524646	-0.0294162	0.00281732
115	Blanton Forest, KY	Quercus mongolica	RP	36.8752	-83.3604	5.6563	19.7672	0.177934	NS	0.162235	NS	-0.218237	<0.05	-0.0105151	NS	0.238073	<0.05	-0.237723	<0.05	-0.0698895	NS	-0.115485	NS	-0.000750272	0.889377	-0.0177411	0.0613614
116	Hemmer, IN	Carya ovata	RP	38.2291	-87.3665	7.34874	19.7992	-0.0014445	NS	0.0232985	NS	0.125721	NS	0.0766733	NS	-0.184079	NS	-0.477591	<0.002	-0.315004	<0.002	-0.298807	<0.002	0.00736966	0.350651	-0.0584105	6.22e-07
117	Hemmer, IN	Quercus alba	RP	38.2291	-87.3665	7.34874	19.7992	0.041798	NS	0.0457099	NS	0.0737672	NS	-0.0371086	NS	-0.223329	<0.05	-0.597685	<0.002	-0.328326	<0.002	-0.314849	<0.05	-0.00149506	0.839313	-0.0729378	1.49e-10
118	Bear Island, MD	Carya glabra	RP	38.9846	-77.2423	7.0042	19.7992	0.0961725	NS	-0.0852799	NS	0.0425709	NS	0.010754	NS	-0.417496	<0.002	-0.255465	<0.05	-0.286388	<0.002	-0.0948825	NS	0.00369213	0.674367	-0.0571452	0.000596814
119	Smithsonian Conservation Biology Institute, VA	Carya cordiformis	RP	38.8935	-78.1454	5.0069	19.8095	0.0253357	NS	-0.0830737	NS	-0.156517	NS	0.0671044	NS	-0.221934	<0.05	-0.288635	<0.05	-0.205946	NS	-0.133068	NS	0.00288686	0.652507	-0.0362882	0.000866765
120	Smithsonian Conservation Biology Institute, VA	Carya glabra	RP	38.8935	-78.1454	5.0069	19.8095	-0.0920193	NS	-0.0707922	NS	-0.128186	NS	0.163705	NS	-0.21269	<0.05	-0.0998948	NS	-0.0206231	NS	-0.0945676	NS	0.00773703	0.175612	-0.0136435	0.150069
121	Smithsonian Conservation Biology Institute, VA	Carya ovalis	RP	38.8935	-78.1454	5.0069	19.8095	0.00601788	NS	0.0130378	NS	-0.0392579	NS	0.186432	<0.05	-0.248718	<0.05	-0.116667	NS	-0.118176	NS	-0.209797	<0.05	0.0111387	0.0648623	-0.0164807	0.0991392
122	Smithsonian Conservation Biology Institute, VA	Carya tomentosa	RP	38.8935	-78.1454	5.0069	19.8095	-0.0631351	NS	-0.183144	NS	-0.247863	<0.05	0.0612103	NS	-0.0811813	NS	-0.237719	<0.05	-0.124907	NS	-0.272002	<0.05	0.00648848	0.487194	-0.0212151	0.172094
123	Smithsonian Conservation Biology Institute, VA	Fraxinus americana	RP	38.8935	-78.1454	5.0069	19.8095	0.0672705	NS	-0.0324772	NS	-0.0525301	NS	0.0324403	NS	-0.308116	<0.002	-0.215929	<0.05	-0.0332903	NS	-0.106493	NS	-0.00432535	0.402274	-0.0172774	0.045239
124	Smithsonian Conservation Biology Institute, VA	Fraxinus nigra	RP	38.8935	-78.1454	5.0069	19.8095	-0.0419077	NS	-0.106422	NS	-0.0130127	NS	-0.161772	NS	-0.0394542	NS	0.0123552	NS	0.145255	NS	-0.0188136	NS	-0.0137672	0.0825709	0.00651874	0.618014
125	Smithsonian Conservation Biology Institute, VA	Quercus alba	RP	38.8935	-78.1454	5.0069	19.8095	-0.0209633	NS	-0.00545562	NS	-0.0859919	NS	0.161668	NS	-0.310199	<0.002	-0.17886	<0.05	-0.175521	NS	-0.208725	<0.05	0.00908575	0.142647	-0.0216452	0.0361455
126	Smithsonian Conservation Biology Institute, VA	Quercus montana	RP	38.8935	-78.1454	5.0069	19.8095	-0.0326245	NS	-0.00880764	NS	-0.108282	NS	0.00172052	NS	-0.237711	<0.05	-0.116063	NS	-0.0629883	NS	-0.199665	NS	0.000800026	0.91123	-0.00810218	0.496446
127	Smithsonian Conservation Biology Institute, VA	Quercus rubra	RP	38.8935	-78.1454	5.0069	19.8095	-0.123643	NS	-0.134139	NS	-0.187714	NS	0.103646	NS	-0.287955	<0.05	-0.128716	NS	-0.280671	<0.002	-0.166125	NS	0.00595413	0.256614	-0.0188821	0.0313175
128	Smithsonian Conservation Biology Institute, VA	Quercus velutina	RP	38.8935	-78.1454	5.0069	19.8095	-0.0601151	NS	-0.133913	NS	-0.0514194	NS	0.0966022	NS	-0.17543	NS	-0.14951	NS	-0.251074	<0.05	-0.235764	<0.05	0.00750696	0.258688	-0.0277074	0.0129106
129	Blue Ridge Parkway, VA	Quercus mongolica	RP	37.5364	-79.4949	5.06723	19.8555	0.13229	NS	0.0042655	NS	-0.0938872	NS	-0.150766	NS	0.165354	NS	-0.0782177	NS	-0.175948	NS	-0.131212	NS	-0.00556016	0.189201	-0.0117193	0.130969
130	Fiddler's Green, VA	Carya ovata	RP	37.7707	-79.2416	5.06723	19.8555	0.0918351	NS	0.0375257	NS	0.0793605	NS	0.180402	NS	-0.21022	<0.05	-0.206551	<0.05	-0.208304	NS	-0.2156	<0.05	0.0184183	0.0387293	-0.0470429	0.00427916
131	Fiddler's Green, VA	Quercus rubra	RP	37.7694	-79.2415	5.06723	19.8555	0.0481838	NS	-0.0874841	NS	-0.0773006	NS	0.0766802	NS	-0.187493	<0.05	-0.225157	<0.05	-0.28609	<0.002	-0.240362	<0.05	0.00656384	0.341649	-0.0425596	0.00101821
132	Irish Creek, VA	Quercus alba	RP	37.6755	-79.288	5.06723	19.8555	-0.0567516	NS	-0.0339669	NS	0.0115928	NS	0.0260425	NS	-0.327399	<0.002	-0.132595	NS	-0.229899	<0.05	-0.137326	NS	0.00218123	0.763995	-0.029593	0.0278445
133	Irish Creek, VA	Quercus mongolica	RP	37.6755	-79.288	5.06723	19.8555	0.181319	NS	0.14974	NS	0.0324353	NS	0.108045	NS	-0.0674918	NS	0.111119	NS	0.0262902	NS	0.0615168	NS	0.00950628	0.332139	0.0160663	0.361959
134	Mt Pleasant, VA	Carya glabra	RP	37.7351	-79.224	5.06723	19.8555	0.0187756	NS	-0.0552691	NS	0.139731	NS	0.0275782	NS	0.0773283	NS	-0.0224766	NS	0.0805169	NS	0.0444791	NS	0.0209356	0.518212	0.00600796	0.917802
135	Mt Pleasant, VA	Quercus velutina	RP	37.7351	-79.224	5.06723	19.8555	0.00726526	NS	-0.224786	<0.05	-0.1473	NS	-0.102692	NS	0.0352864	NS	-0.144432	NS	-0.20434	<0.05	-0.0469572	NS	-0.00603554	0.346435	-0.0246204	0.037458
136	Feryne Cliffe Nature Preserve, IL	Quercus alba	RP	37.5294	-88.9828	7.63361	20.5773	-0.00535885	NS	-0.0260301	NS	0.0464775	NS	-0.0942372	NS	-0.396083	<0.002	-0.661747	<0.002	-0.27919	<0.002	-0.234127	<0.05	-0.00277427	0.631441	-0.061807	7.98e-12
137	Giant City State Park, IL	Quercus alba	RP	37.6	-89.2	7.57899	20.5966	-0.0497053	NS	-0.0377263	NS	-0.0830301	NS	-0.0456029	NS	-0.336417	<0.002	-0.630207	<0.002	-0.303806	<0.002	-0.259851	<0.05	0.000962599	0.873418	-0.0599457	5.28e-11
138	Chinquapin Ridge, TN	Quercus alba	RP	35.6892	-83.6111	6.67899	20.9857	-0.00466782	NS	-0.0991482	NS	0.0159171	NS	-0.0100073	NS	0.0122267	NS	-0.261925	<0.05	-0.193427	<0.05	-0.012151	NS	0.00119098	0.844399	-0.0285048	0.00354161
139	Big Canoe, GA	Quercus alba	RP	34.4757	-84.3293	8.6916	21.9807	-0.00396693	NS	0.023496	NS	0.035106	NS	0.0350146	NS	-0.01597	NS	-0.357051	<0.05	-0.141905	NS	-0.025991	NS	0.000643641	0.921055	-0.0267011	0.00213574
140	Three Ponds, KY	Carya tomentosa	RP	36.6702	-89.1276	9.17983	22.2647	0.0114026	NS	-0.0185912	NS	0.0476451	NS	-0.0439436	NS	-0.224914	<0.05	-0.403983	<0.002	-0.19139	NS	-0.190155	<0.05	-0.00177291	0.836797	-0.0435759	0.000351729
141	Sipsey Wilderness, AL	Carya glabra	RP	34.3574	-87.4274	9.51345	22.916	0.139621	NS	-0.0281918	NS	0.134617	NS	0.0736492	NS	-0.539073	<0.002	-0.394934	<0.002	-0.233088	<0.05	-0.0768604	NS	0.0053158	0.517405	-0.042697	0.000162467
142	UMB MI Flux Site, MI	Acer rubrum	DP	45.5598	-84.7138	-1.48824	10.0555	0.0605367	NS	-0.0314521	NS	-0.0666597	NS	-0.0208097	NS	0.0148774	NS	-0.210423	<0.05	-0.205106	NS	-0.120405	NS	0.00426902	0.665889	-0.042572	0.0122104
143	UMB MI Flux Site, MI	Populus grandidentata	DP	45.5598	-84.7138	-1.48824	10.0555	0.0734212	NS	-0.119865	NS	-0.0722018	NS	-0.0892945	NS	0.104876	NS	-0.0470977	NS	0.0580511	NS	-0.0397087	NS	-0.00888996	0.389649	0.00419941	0.810316
144	Goose Egg Ridge, NY	Fagus grandifolia	DP	43.0699	-73.2867	-0.589916	12.4748	0.0576467	NS	0.0918595	NS	-0.0874664	NS	0.0241992	NS	0.0233143	NS	-0.220467	<0.05	-0.212589	<0.05	-0.127662	NS	0.00458442	0.5119	-0.0393736	0.00415093
145	Lincoln coln Mountain Sta.Forest, NY	Nyssa sylvatica	DP	43.1747	-73.8168	0.289916	13.0176	0.0468406	NS	0.0557838	NS	0.0480553	NS	0.162507	NS	-0.0543199	NS	-0.0976538	NS	0.0818264	NS	-0.0845318	NS	0.009829	0.0940848	-0.00238973	0.829246
146	Prospect Mountain ADKs, NY	Betula lenta	DP	43.4175	-73.729	0.289916	13.0176	-0.0302302	NS	0.00173974	NS	0.0597375	NS	-0.055855	NS	-0.283098	<0.002	-0.29767	<0.002	-0.129439	NS	-0.0639869	NS	-0.00255348	0.734919	-0.0382678	0.0087802
147	Harvard Forest, MA	Acer rubrum	DP	42.5388	-72.1755	0.596639	14.3882	0.234286	<0.05	-0.12617	NS	-0.156643	NS	-0.24077	<0.05	0.148875	NS	-0.149325	NS	-0.132083	NS	-0.122273	NS	-0.0171846	0.0413123	-0.0425355	0.00325292
148	Harvard Forest, MA	Betula alleghaniensis	DP	42.5388	-72.1755	0.596639	14.3882	0.113964	NS	-0.043326	NS	-0.252551	NS	-0.15227	NS	0.214632	NS	-0.251956	<0.05	-0.203989	NS	-0.149931	NS	-0.0130607	0.197593	-0.0327461	0.0725437
149	NorthRoundPondPlot1, NH	Acer saccharum	DP	42.8451	-72.4473	0.596639	14.3882	-0.0447689	NS	-0.0580763	NS	-0.136284	NS	0.050798	NS	-0.00655597	NS	0.0266959	NS	-0.129867	NS	0.096352	NS	0.00639245	0.451493	-0.0101203	0.482951
150	NorthRoundPondPlot1, NH	Fagus grandifolia	DP	42.8451	-72.4473	0.596639	14.3882	-0.0796038	NS	-0.0156145	NS	-0.0480981	NS	0.0222741	NS	0.133924	NS	0.0130401	NS	0.00788808	NS	0.0760174	NS	0.00119633	0.837041	0.00177379	0.85752
151	NorthRoundPondPlot3, NH	Acer rubrum	DP	42.8442	-72.4498	0.596639	14.3882	-0.105339	NS	0.00183686	NS	-0.021545	NS	0.0288737	NS	0.033226	NS	-0.169463	NS	-0.214557	<0.05	-0.0484165	NS	0.00538512	0.485139	-0.033738	0.0110876
152	NorthRoundPondPlot3, NH	Betula lenta	DP	42.8442	-72.4498	0.596639	14.3882	0.0595902	NS	-0.19117	<0.05	-0.119982	NS	0.0645512	NS	-0.0322201	NS	-0.19367	NS	-0.237909	<0.05	-0.140697	NS	0.0142089	0.320042	-0.0724271	0.00850387
153	Harvard Forest LyfordPlots, MA	Acer rubrum	DP	42.53	-72.18	0.596639	14.3882	0.106852	NS	-0.0956081	NS	-0.150702	NS	-0.119493	NS	0.095179	NS	-0.107671	NS	-0.155878	NS	0.0301121	NS	-0.0070702	0.29163	-0.0172465	0.130953
154	Bendix, IN	Acer saccharum	DP	41.6647	-86.5082	3.58319	14.642	0.0145613	NS	-0.142968	NS	-0.0615509	NS	0.0394839	NS	0.0909336	NS	-0.397941	<0.002	-0.30188	<0.002	-0.202501	NS	0.0117549	0.176271	-0.0651492	1.93e-06
155	Warren, MI	Fagus grandifolia	DP	41.8278	-86.6233	3.58319	14.642	-0.176339	NS	-0.268667	<0.05	-0.178555	NS	0.0271497	NS	0.0901613	NS	-0.483599	<0.002	-0.347134	<0.002	-0.289568	<0.002	0.0105804	0.127312	-0.0671101	2.65e-09
156	Alan Seeger Natural Area, PA	Liriodendron tulipifera	DP	40.69	-77.75	2.96218	14.6874	0.268801	<0.05	0.114157	NS	0.0474068	NS	0.142059	<0.05	-0.0336389	NS	-0.119621	NS	-0.148898	NS	-0.0766419	NS	0.0134726	0.123651	-0.0246648	0.0868173
157	Montgomery Place, NY	Liriodendron tulipifera	DP	42.0088	-73.9188	1.97815	14.805	0.227556	<0.05	0.0851892	NS	0.164125	NS	0.243656	<0.05	-0.120546	NS	-0.211053	<0.05	-0.132108	NS	-0.103338	NS	0.0260893	0.00215376	-0.0453183	0.00400664
158	Mohonk Preserve, NY	Betula lenta	DP	41.7986	-74.1125	2.05294	15.3	0.184602	NS	-0.0194305	NS	0.0835244	NS	-0.0811496	NS	0.0424423	NS	-0.0581575	NS	0.0673386	NS	-0.0447351	NS	-0.0235181	0.518858	-0.0119926	0.84397
159	Mohonk Preserve, NY	Liriodendron tulipifera	DP	41.7986	-74.1125	2.05294	15.3	0.114161	NS	0.0995335	NS	0.0994254	NS	0.134523	NS	-0.174632	NS	-0.245732	<0.05	-0.176371	NS	-0.0534213	NS	0.0164952	0.059748	-0.0447683	0.0027705
160	Palmaghatt1, NY	Betula alleghaniensis	DP	41.71	-74.2473	2.05294	15.3	-0.124728	NS	-0.170444	NS	0.00259439	NS	-0.122382	NS	-0.0638265	NS	-0.368396	<0.002	-0.123351	NS	-0.0236101	NS	-0.0034481	0.572769	-0.0323215	0.00188258
161	Canterbury, IN	Liriodendron tulipifera	DP	41.1262	-85.1099	3.49664	15.3555	0.0352523	NS	0.0127147	NS	-0.00505503	NS	0.00702151	NS	-0.137965	NS	-0.535021	<0.002	-0.357063	<0.05	-0.250641	<0.05	0.00719998	0.351332	-0.0782425	6.65e-10
162	Oppenheim, IN	Acer saccharum	DP	41.3395	-85.7635	3.52689	15.4151	-0.00419079	NS	0.083657	NS	-0.0482392	NS	0.0322105	NS	-0.00232577	NS	0.0489046	NS	0.0293154	NS	0.121992	NS	0.00167952	0.799797	0.00542343	0.59137
163	Oppenheim, IN	Liriodendron tulipifera	DP	41.3395	-85.7635	3.52689	15.4151	0.119734	NS	0.0512641	NS	0.00443941	NS	0.046028	NS	-0.102297	NS	-0.383287	<0.002	-0.200738	NS	-0.123214	NS	0.0097811	0.244729	-0.0556132	2.88e-05
164	Ginn, IN	Liriodendron tulipifera	DP	40.3481	-85.4388	3.68151	15.5462	0.0351223	NS	-0.0600615	NS	-0.0881004	NS	0.068224	NS	-0.0700345	NS	-0.493979	<0.002	-0.346213	<0.002	-0.191512	<0.05	0.0148254	0.203208	-0.104077	1.09e-08
165	Davey Woods, OH	Liriodendron tulipifera	DP	40.1376	-83.9079	2.83193	15.5571	0.087937	NS	-0.0239742	NS	-0.00664492	NS	0.117476	NS	-0.124642	NS	-0.476604	<0.002	-0.306132	<0.002	-0.165451	NS	0.0157028	0.0930736	-0.0804896	1.08e-07
166	Hueston Woods, OH	Fagus grandifolia	DP	39.5783	-84.739	4.35294	16.6	0.0651549	NS	-0.0229765	NS	-0.108134	NS	0.120865	NS	-0.0809229	NS	-0.481993	<0.002	-0.238988	<0.05	-0.134092	NS	0.0164607	0.0456614	-0.0658286	3.78e-07
167	Hueston Woods, OH	Liriodendron tulipifera	DP	39.5783	-84.739	4.35294	16.6	0.0693297	NS	0.00458484	NS	-0.0702682	NS	0.119577	NS	-0.127593	NS	-0.4393	<0.002	-0.256035	<0.05	-0.176681	NS	0.0209498	0.0641715	-0.0881443	7.15e-07
168	Meltzer, IN	Acer saccharum	DP	39.5051	-85.6691	4.6479	16.8092	-0.0491182	NS	0.0160614	NS	-0.0726428	NS	0.000154534	NS	-0.185037	NS	-0.220062	<0.05	-0.216181	NS	-0.20694	NS	0.0025294	0.790977	-0.0326787	0.0149819
169	Meltzer, IN	Liriodendron tulipifera	DP	39.5051	-85.6691	4.6479	16.8092	0.077078	NS	-0.0454566	NS	-0.091912	NS	0.0578389	NS	-0.20402	<0.05	-0.467491	<0.002	-0.366435	<0.002	-0.279604	<0.05	0.011781	0.288901	-0.0973081	1.73e-08
170	Kickapoo, IL	Acer saccharum	DP	40.1383	-87.7458	4.78067	17.5084	-0.093659	NS	-0.0847745	NS	-0.159227	NS	0.0722067	NS	-0.148241	NS	-0.469066	<0.002	-0.378848	<0.002	-0.326936	<0.05	0.011547	0.116084	-0.0651786	4.86e-09
171	Otter Creek, PA	Liriodendron tulipifera	DP	39.8785	-76.3864	4.1395	17.6261	0.160146	NS	0.0934618	NS	-0.103372	NS	-0.00566153	NS	0.0497337	NS	-0.157202	<0.05	-0.0893715	NS	0.0901495	NS	0.00385102	0.731173	-0.0326456	0.101374
172	Latimer Woods, IN	Acer saccharum	DP	39.1583	-86.4934	5.06218	18.0067	-0.0515919	NS	0.00398997	NS	0.0264896	NS	0.0400506	NS	-0.19653	<0.05	-0.482851	<0.002	-0.300817	<0.05	-0.334336	<0.002	0.0064739	0.397388	-0.0598292	2.02e-07
173	Latimer Woods, IN	Liriodendron tulipifera	DP	39.1583	-86.4934	5.06218	18.0067	0.017242	NS	-0.155267	NS	-0.0841533	NS	0.04985	NS	-0.0683129	NS	-0.407171	<0.002	-0.312335	<0.002	-0.307654	<0.002	0.00886094	0.411339	-0.0759738	2.23e-06
174	Lily Dicky Nature Preserve, IN	Acer saccharum	DP	39.2361	-86.2204	5.06218	18.0067	-0.11479	NS	-0.0130981	NS	-0.0395432	NS	-0.00137649	NS	-0.00907604	NS	-0.252086	<0.002	-0.100643	NS	-0.157987	NS	0.00202015	0.81159	-0.0278642	0.0219055
175	Lily Dicky Nature Preserve, IN	Liriodendron tulipifera	DP	39.2361	-86.2204	5.06218	18.0067	0.106831	NS	0.000608681	NS	-0.0948663	NS	0.0668001	NS	-0.112156	NS	-0.502926	<0.002	-0.368081	<0.002	-0.348558	<0.05	0.00803259	0.379227	-0.0749375	6.86e-08
176	MMSF Flux Site, IN	Acer saccharum	DP	39.3232	-86.4131	5.06218	18.0067	0.0274069	NS	0.00329293	NS	-0.00672796	NS	0.0687747	NS	-0.0349898	NS	-0.373702	<0.002	-0.25931	<0.05	-0.159596	NS	0.00819123	0.323051	-0.0470463	8.74e-05
177	MMSF Flux Site, IN	Liriodendron tulipifera	DP	39.3232	-86.4131	5.06218	18.0067	0.107525	NS	-0.0275051	NS	0.031916	NS	0.130175	NS	-0.125068	NS	-0.291567	<0.05	-0.191941	NS	-0.177517	NS	0.0144646	0.235217	-0.0454417	0.00561802
178	Lincoln's New Salem, IL	Acer saccharum	DP	39.9829	-89.8524	5.92185	18.0697	-0.0586895	NS	-0.0922514	NS	-0.158143	NS	0.110403	NS	-0.110935	NS	-0.281604	<0.002	-0.297338	<0.002	-0.232936	<0.05	0.013302	0.0895969	-0.0450506	9.91e-05
179	Riddle, OH	Liriodendron tulipifera	DP	39.3494	-82.0724	4.15294	18.1261	0.136308	NS	0.0679725	NS	-0.095458	NS	0.0674034	NS	-0.272659	<0.002	-0.284268	<0.002	-0.173046	NS	-0.177746	NS	0.00518788	0.592436	-0.0451812	0.0072554
180	Hoot Woods Site Easement, IN	Liriodendron tulipifera	DP	39.25	-86.89	5.34034	18.3118	0.0438861	NS	-0.0530002	NS	-0.0932824	NS	0.0418062	NS	-0.0446916	NS	-0.386661	<0.002	-0.276478	<0.05	-0.136452	NS	0.00742385	0.435967	-0.0611531	1.68e-05
181	Fox Ridge, IL	Acer saccharum	DP	39.3956	-88.1613	6.3563	18.6412	-0.201371	<0.05	-0.131973	NS	-0.133468	NS	0.0648688	NS	-0.136359	NS	-0.461347	<0.002	-0.358594	<0.002	-0.351392	<0.002	0.0141087	0.175402	-0.086119	3.08e-08
182	MOz Flux Site, MO	Acer saccharum	DP	38.7441	-92.2	6.88908	19.0975	-0.0486823	NS	-0.0616445	NS	-0.192449	NS	0.0187057	NS	-0.237303	<0.05	-0.406477	<0.002	-0.277007	<0.05	-0.120271	NS	0.00582062	0.548415	-0.0471108	0.00024033
183	Donaldson Woods Nature Preserve, IN	Acer saccharum	DP	38.73	-86.42	5.52101	19.1109	-0.00855483	NS	-0.0731395	NS	-0.089373	NS	0.104477	NS	-0.167943	NS	-0.450193	<0.002	-0.253331	<0.05	-0.257431	<0.002	0.0109848	0.209617	-0.0574625	8.49e-06
184	Donaldson Woods Nature Preserve, IN	Liriodendron tulipifera	DP	38.73	-86.42	5.52101	19.1109	-0.0294314	NS	-0.0337159	NS	-0.0593154	NS	0.0804463	NS	-0.0943026	NS	-0.329323	<0.002	-0.293143	<0.05	-0.311653	<0.002	0.0103591	0.342239	-0.0605481	0.000149985
185	Pionner Mothers Research Natural Area, IN	Acer saccharum	DP	38.54	-86.45	5.52101	19.1109	-0.0486757	NS	-0.0956137	NS	-0.132989	NS	0.0689758	NS	-0.122323	NS	-0.495628	<0.002	-0.270815	<0.05	-0.211852	NS	0.00814104	0.27229	-0.0566547	3.73e-07
186	Pionner Mothers Research Natural Area, IN	Liriodendron tulipifera	DP	38.54	-86.45	5.52101	19.1109	-0.087929	NS	-0.131298	NS	-0.0832777	NS	0.00289563	NS	-0.147547	NS	-0.532363	<0.002	-0.360008	<0.002	-0.378688	<0.002	0.00302337	0.702278	-0.072384	3.57e-09
187	Babler, MO	Acer saccharum	DP	38.6204	-90.6947	7.33613	19.2193	-0.164385	<0.05	-0.321929	<0.002	-0.0184486	NS	0.146223	NS	-0.096489	NS	-0.353722	<0.002	-0.281601	<0.002	-0.144797	NS	0.0174951	0.0373043	-0.0485713	3.82e-05
188	Beall Woods, IL	Acer saccharum	DP	38.3498	-87.8281	7.31765	19.2235	-0.0245443	NS	-0.135201	NS	-0.0725867	NS	0.153074	NS	-0.14339	NS	-0.377376	<0.002	-0.318246	<0.002	-0.205246	<0.05	0.0196751	0.0222931	-0.0633223	8.9e-07
189	Beall Woods, IL	Liriodendron tulipifera	DP	38.3498	-87.8281	7.31765	19.2235	-0.0139113	NS	-0.0307455	NS	0.0150865	NS	0.0706172	NS	-0.12928	NS	-0.426872	<0.002	-0.270577	<0.05	-0.199114	<0.05	0.0107042	0.249752	-0.0658676	2.45e-06
190	Joyce Kilmer, NC	Liriodendron tulipifera	DP	35.3585	-83.9303	5.26891	19.3992	0.242616	<0.002	-0.0253398	NS	0.10556	NS	-0.0738407	NS	-0.0841297	NS	-0.214796	<0.05	-0.168926	NS	-0.187531	<0.05	-0.00832161	0.413981	-0.0362531	0.0162198
191	Boogerman, TN	Liriodendron tulipifera	DP	35.6212	-83.0863	5.3042	19.616	0.337997	<0.002	0.0885673	NS	0.0229027	NS	0.023382	NS	-0.0220433	NS	-0.21684	<0.05	-0.0489564	NS	-0.0747222	NS	0.000269378	0.973262	-0.0210187	0.0895295
192	Porter's Creek, TN	Liriodendron tulipifera	DP	35.6771	-83.3971	5.3042	19.616	0.267824	<0.05	0.00174734	NS	-0.0298245	NS	-0.0864736	NS	-0.105164	NS	-0.222372	<0.05	-0.10986	NS	-0.0612755	NS	-0.0067726	0.444363	-0.028197	0.0390398
193	Rainbow Falls, TN	Liriodendron tulipifera	DP	35.665	-83.4632	5.3042	19.616	0.251785	<0.05	0.0459807	NS	0.0236403	NS	0.0513571	NS	-0.159834	NS	-0.275989	<0.05	-0.128328	NS	-0.226981	<0.05	0.00675057	0.473753	-0.0387307	0.00811334
194	Hemmer, IN	Acer saccharum	DP	38.2291	-87.3665	7.34874	19.7992	0.0925609	NS	-0.142522	NS	0.110333	NS	0.270978	<0.05	-0.120512	NS	-0.470771	<0.002	-0.312688	<0.002	-0.201178	NS	0.026823	0.002027	-0.0659608	2.38e-06
195	Smithsonian Conservation Biology Institute, VA	Fagus grandifolia	DP	38.8935	-78.1454	5.0069	19.8095	-0.190275	NS	-0.0692823	NS	0.00507586	NS	0.239264	<0.05	-0.197661	NS	-0.146588	NS	-0.288408	<0.05	-0.236682	NS	0.0115502	0.135521	-0.0402603	0.00224496
196	Smithsonian Conservation Biology Institute, VA	Liriodendron tulipifera	DP	38.8935	-78.1454	5.0069	19.8095	0.00873804	NS	-0.112015	NS	-0.0354711	NS	0.118889	NS	-0.265545	<0.05	-0.23795	<0.05	-0.176825	NS	-0.212664	<0.05	0.0012497	0.863618	0.00160652	0.89408
197	Fiddler's Green, VA	Liriodendron tulipifera	DP	37.7694	-79.2415	5.06723	19.8555	0.22266	NS	0.057457	NS	-0.0433325	NS	-0.0106149	NS	-0.0867539	NS	-0.21064	<0.05	-0.24921	<0.05	-0.192456	<0.05	-0.00189339	0.856918	-0.053143	0.00663843
198	Fiddler's Green, VA	Magnolia acuminata	DP	37.7687	-79.2424	5.06723	19.8555	0.0979507	NS	-0.0614797	NS	-0.0752214	NS	0.164435	NS	-0.0324334	NS	-0.130845	NS	-0.0521989	NS	-0.0487414	NS	0.0144354	0.113923	-0.0202263	0.224862
199	Wesselman, IN	Liriodendron tulipifera	DP	37.9847	-87.5125	7.78319	20.121	0.0621588	NS	-0.0275757	NS	0.00454747	NS	0.125302	NS	-0.215114	<0.05	-0.405045	<0.002	-0.312093	<0.002	-0.264154	<0.05	0.0178259	0.0919964	-0.0776097	7.37e-07
200	Daniel Boone London District, KY	Fagus grandifolia	DP	37.13	-84.27	5.92857	20.2983	0.0481637	NS	-0.0229693	NS	-0.0860092	NS	0.0222144	NS	0.0263608	NS	-0.370644	<0.002	-0.205745	<0.05	-0.132774	NS	-0.000628046	0.931523	-0.0415106	0.000658596
201	Daniel Boone London District, KY	Liriodendron tulipifera	DP	37.13	-84.27	5.92857	20.2983	0.221659	<0.05	-0.0306197	NS	-0.0328836	NS	-0.0572945	NS	-0.00992453	NS	-0.344537	<0.002	-0.11168	NS	-0.137755	NS	-0.00684168	0.448229	-0.041059	0.00581154
202	Mammoth Cave, KY	Liriodendron tulipifera	DP	37.187	-86.104	7.27563	20.4874	0.0919223	NS	-0.145301	NS	-0.0503383	NS	-0.0883925	NS	-0.0567145	NS	-0.409386	<0.002	-0.114906	NS	-0.143179	NS	-0.00914164	0.343296	-0.0480849	0.000699616
203	Feryne Cliffe Nature Preserve, IL	Liriodendron tulipifera	DP	37.5294	-88.9828	7.63361	20.5773	-0.0159069	NS	-0.0628201	NS	-0.0372542	NS	-0.0219034	NS	-0.256055	<0.05	-0.496011	<0.002	-0.394152	<0.002	-0.23137	<0.05	0.00609646	0.54576	-0.101293	9.23e-11
204	Frick Creek, GA	Liriodendron tulipifera	DP	34.76	-84.3	6.91765	20.7412	0.286624	<0.05	0.0586447	NS	-0.0549336	NS	-0.128997	NS	-0.0699792	NS	-0.236492	NS	-0.00515132	NS	-0.0103006	NS	-0.0155939	0.0904119	-0.0166169	0.179348
205	Chinquapin Ridge, TN	Liriodendron tulipifera	DP	35.6892	-83.6111	6.67899	20.9857	0.178023	<0.05	0.086529	NS	0.0183002	NS	-0.0391555	NS	-0.0365736	NS	-0.253749	<0.002	-0.2177	<0.05	-0.0784646	NS	-0.00518812	0.543629	-0.0396435	0.00392185
206	Forge Creek, TN	Liriodendron tulipifera	DP	35.5536	-83.8385	6.67899	20.9857	0.297533	<0.002	0.131445	NS	-0.0327317	NS	-0.0695888	NS	-0.185832	<0.05	-0.399375	<0.002	-0.301742	<0.002	-0.268839	<0.05	-0.00358621	0.692693	-0.0691932	4.16e-06
207	Scotts Gap, TN	Liriodendron tulipifera	DP	35.5949	-83.9162	6.67899	20.9857	0.112576	NS	0.0156503	NS	-0.0958126	NS	-0.16122	<0.05	-0.227525	<0.05	-0.436857	<0.002	-0.30456	<0.002	-0.188208	<0.05	-0.0132874	0.216255	-0.0884467	7.54e-07
